# Supplementary material for: A facile synthesis of molecularly imprinted polymers and their properties as electrochemical sensors for ethyl carbamate analysis
Source: Royal Society of Chemistry journal article supplement (doi:10.1039/c8ra08213h), 2018-01-01
Supplement: c8ra08213h1.pdf [file c8ra08213h1.pdf]

## Electronic Supplementary Information

# A Facile Synthesis of Molecularly Imprinted Polymer and its Properties as Electrochemical Sensor for Ethyl Carbamate Analysis

### 1. The FT-IR spectroscopy

The Fourier transform infrared spectroscopy (IR) was used to detect the structure of  $\beta$ -cyclodextrin ( $\beta$ -CD),  $\beta$ -cyclodextrin aldehyde ( $\beta$ -CDA) and molecularly imprinted polymer (MIP).

The IR spectra recorded are shown in Fig. S1, and the spectral peaks are also listed in Table S1.

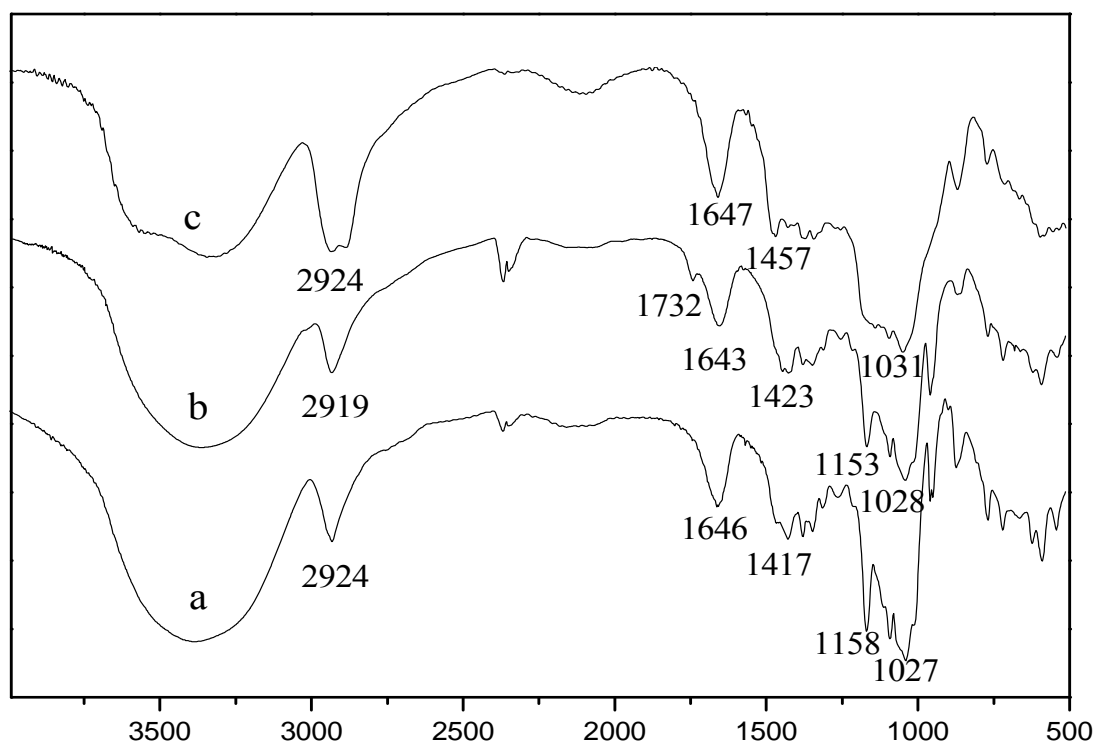

**Fig. S1.** FT-IR spectra of raw  $\beta$ -CD (a),  $\beta$ -CDA (b) and MIP(c)

**Table S1.** Infrared Absorption Characteristics of  $\beta$ -CD,  $\beta$ -CDA and MIP

| Wave Number<br>( $\text{cm}^{-1}$ ) | Functional Group                                                                          | Wave Number<br>( $\text{cm}^{-1}$ ) | Functional Group                 |
|-------------------------------------|-------------------------------------------------------------------------------------------|-------------------------------------|----------------------------------|
| 3500-3200                           | $\beta$ -CD -OH (s, $\nu$ )                                                               | 1417                                | $\beta$ -CD C-H ( $\delta$ )     |
| 2924(2950-2850)                     | $\beta$ -CD -CH <sub>2</sub> , -CH (s, $\nu_{\text{as}}$ , $\nu_{\text{s}}$ )             | 1158, 1027                          | $\beta$ -CD C-OH (s, $\delta$ )  |
| 1646                                | $\beta$ -CD C=O (m, $\nu$ )                                                               | 1153, 1028                          | $\beta$ -CDA C-OH (s, $\delta$ ) |
| 3500-3200                           | $\beta$ -CDA -OH (s, $\nu$ )                                                              | 1643                                | $\beta$ -CDA C=O (m, $\nu$ )     |
| 2919(2950-2850)                     | $\beta$ -CDA -CH (s, $\nu_{\text{s}}$ )                                                   | 1423                                | $\beta$ -CDA C-H ( $\delta$ )    |
| 1732                                | $\beta$ -CDA -HC=O (s, $\nu$ )                                                            | 1647                                | MIP C=O (m, $\nu$ )              |
| 3500-3200                           | MIP -OH (s, $\nu$ )                                                                       | 1457                                | MIP C-H (w, $\delta$ )           |
| 2924(2950-2850)                     | MIP -CH <sub>2</sub> -, -CH <sub>3</sub> , -CH (m, $\nu_{\text{as}}$ , $\nu_{\text{s}}$ ) | 1031                                | MIP C-OH(m, $\delta$ )           |

## 2. The CP/MAS $^{13}\text{C}$ -NMR

$^{13}\text{C}$ -NMR spectra of  $\beta$ -CD,  $\beta$ -CDA and MIP were recorded by Avance II /400M Hz nuclear magnetic resonance spectrometer, and the  $^{13}\text{C}$ -NMR spectra are shown in Fig. S2 and S3. The chemical shifts are summarized in Table S2.

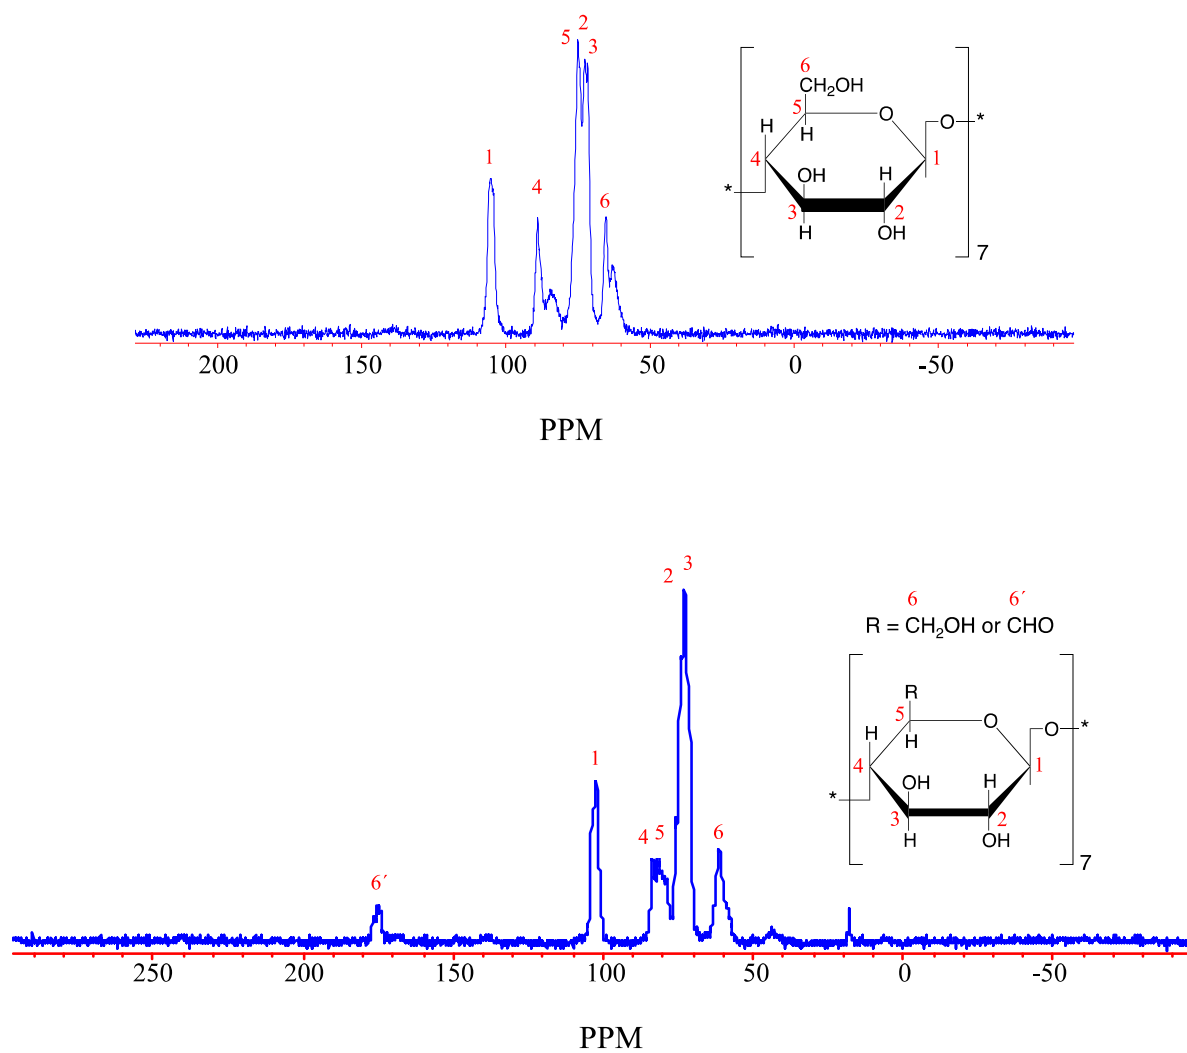

**Fig. S2.**  $^{13}\text{C}$ -NMR spectra of  $\beta$ -CD and  $\beta$ -CDA

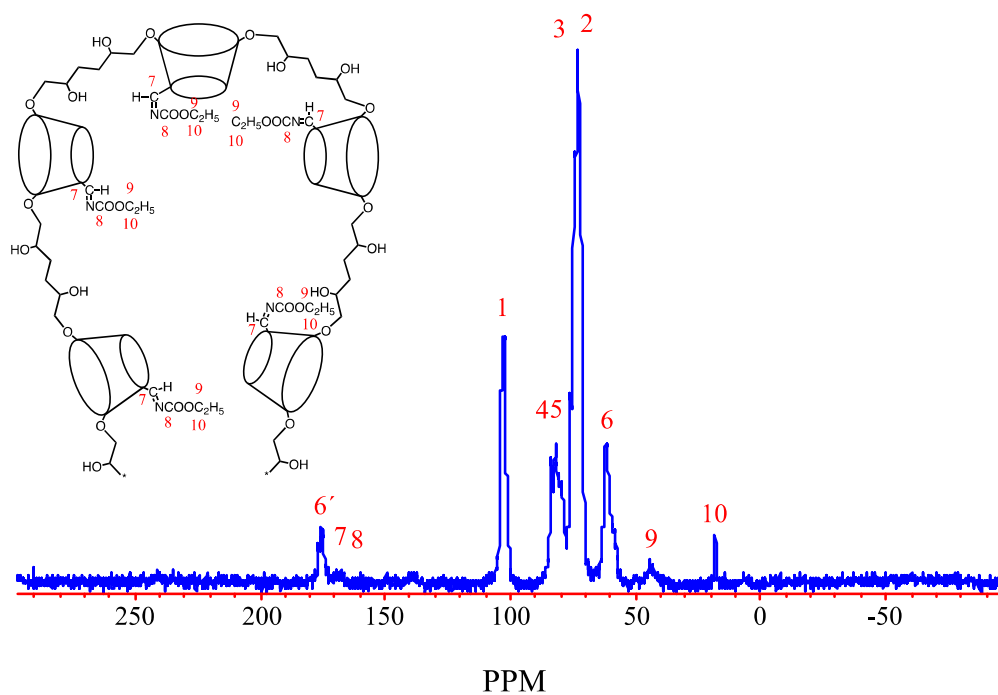

**Fig. S3.**  $^{13}\text{C}$ -NMR spectra of MIP

**Table S2**  $^{13}\text{C}$ -NMR spectral peaks ascription of  $\beta$ -CD,  $\beta$ -CDA and MIP

| Carbon               | $\beta$ -CD (ppm) | $\beta$ -CDA (ppm) | MIP (ppm)                  |
|----------------------|-------------------|--------------------|----------------------------|
| C <sub>1</sub>       | 105.11 (s)        | 102.61 (s)         | 105.8 (C <sub>1</sub> , d) |
| C <sub>2</sub>       | 75.01 (s)         | 76.81 (s)          | 75.01 (C <sub>2</sub> , s) |
| C <sub>3</sub>       | 72.46 (s)         | 72.87 (s)          | 71.25(C <sub>3</sub> , s)  |
| C <sub>4</sub>       | 88.86 (s)         | 83.67 (s)          | 88.91(C <sub>4</sub> , s)  |
| C <sub>5</sub>       | 81.53 (s)         | 81.93 (s)          | 82.56(C <sub>5</sub> , s)  |
| C <sub>6</sub> -CHOH | 65.23 (s)         | 65.05 (s)          | 65.05 (s)                  |
| C <sub>6'</sub> -CHO |                   | 174.93 (d)         | 174.93 (d)                 |
| C <sub>7</sub>       |                   |                    | 168.54 (s)                 |
| C <sub>8</sub>       |                   |                    | 161.01 (s)                 |
| C <sub>9</sub>       |                   |                    | 45.83 (d)                  |
| C <sub>10</sub>      |                   |                    | 18.46 (d)                  |

### 3. The SEM

Fig. S4 shows the morphology of  $\beta$ -CD,  $\beta$ -CDA and MIP by using the scanning electron microscope (SEM,  $\delta$  is the unit of scale, and  $\times$  is the magnification).

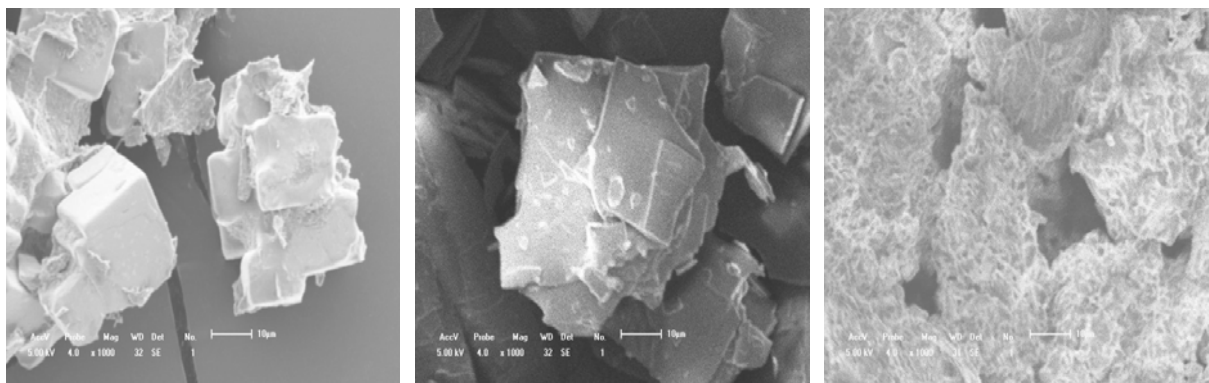

SEM of  $\beta$ -CD  $\times 1000$   $\delta = 10.0 \mu\text{m}$

SEM of  $\beta$ -CDA  $\times 1000$   $\delta = 10.0 \mu\text{m}$

SEM of MIP  $\times 1000$   $\delta = 10.0 \mu\text{m}$

**Fig. S4.** SEM of  $\beta$ -CD,  $\beta$ -CDA and MIP ( $\times 1000$ )

As shown in the SEM photos, the surface topography of  $\beta$ -CD is very smooth and glossy. However, after selective oxidation of  $\beta$ -CD, although the  $\beta$ -CDA retains the basic morphologic structure of  $\beta$ -CD, some corrugations and cracks appear on the main structure. The structure of MIP appears porous with a number of distributed cavities, which will be involved in EC adsorption and separation.

#### 4. The XRD

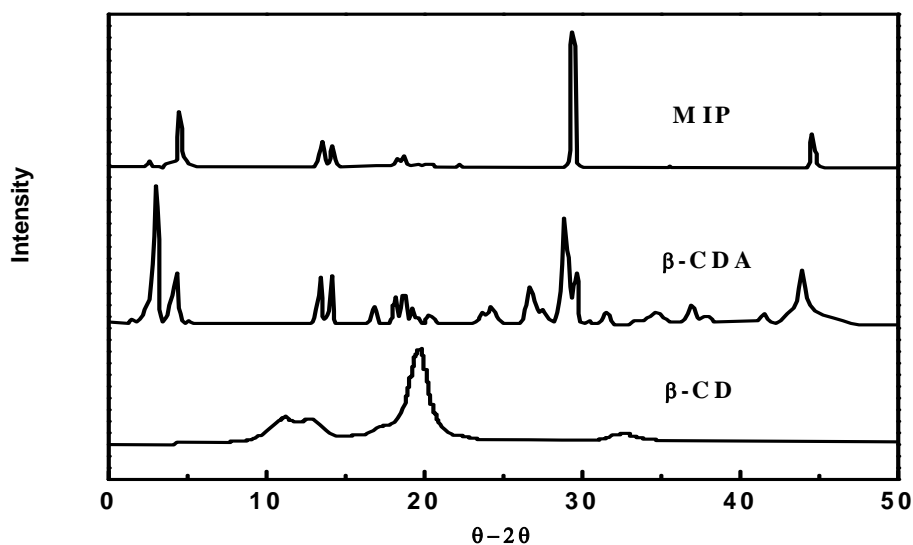

**Fig. S5.** X-ray diffraction spectra of  $\beta$ -CD,  $\beta$ -CDA and MIP

**Table S3** The crystallinity of  $\beta$ -CD,  $\beta$ -CDA and MIP

| Sample                         | <i>K</i> value | Scanning range | Crystallinity |
|--------------------------------|----------------|----------------|---------------|
| $\beta$ -CD                    | 0.10           | 0°- 60°        | 56.5          |
| $\beta$ -cyclodextrin aldehyde | 0.10           | 0°- 60°        | 75.9          |
| MIP                            | 0.10           | 0°- 60°        | 38.1          |

From Fig. S5 and Table S3, it is evident that the structure of  $\beta$ -CD consists of crystalline as well as amorphous regions. The crystallinity of  $\beta$ -CD is 56.5%. The diffraction peaks at  $2\theta=12.2^\circ$  and  $2\theta=13.3^\circ$  exhibit amorphous characteristics while the diffraction peak at  $2\theta=19.6^\circ$  exhibit crystal characteristics. After selective oxidation of  $\beta$ -CD, the intensity of the crystal diffraction peaks are significantly decreased. Around  $2\theta=18.0^\circ$  there is a group of narrow crystal diffraction peaks. At  $2\theta=3.6^\circ$ ,  $2\theta=14.5^\circ$ ,  $2\theta=26.8^\circ$ ,  $2\theta=29.5^\circ$  and  $2\theta=44.4^\circ$ , high strength crystal diffraction

peaks appear. The crystallinity of  $\beta$ -CDA is 75.9 %. After the cross-linking polymerization, the crystallinity decreases and is 38.1 %. For the MIP. At  $2\theta=4.4^\circ$ ,  $2\theta=31.1^\circ$  and  $2\theta=44.9^\circ$ , crystal diffraction peaks appear, which means that new forces were built during the process of association and polymerization.

## 5. The Biodegradation test

Fig. S6 shows the growth of *Aspergillus niger* colonies after incubation for 7, 14 and 21 days, respectively.

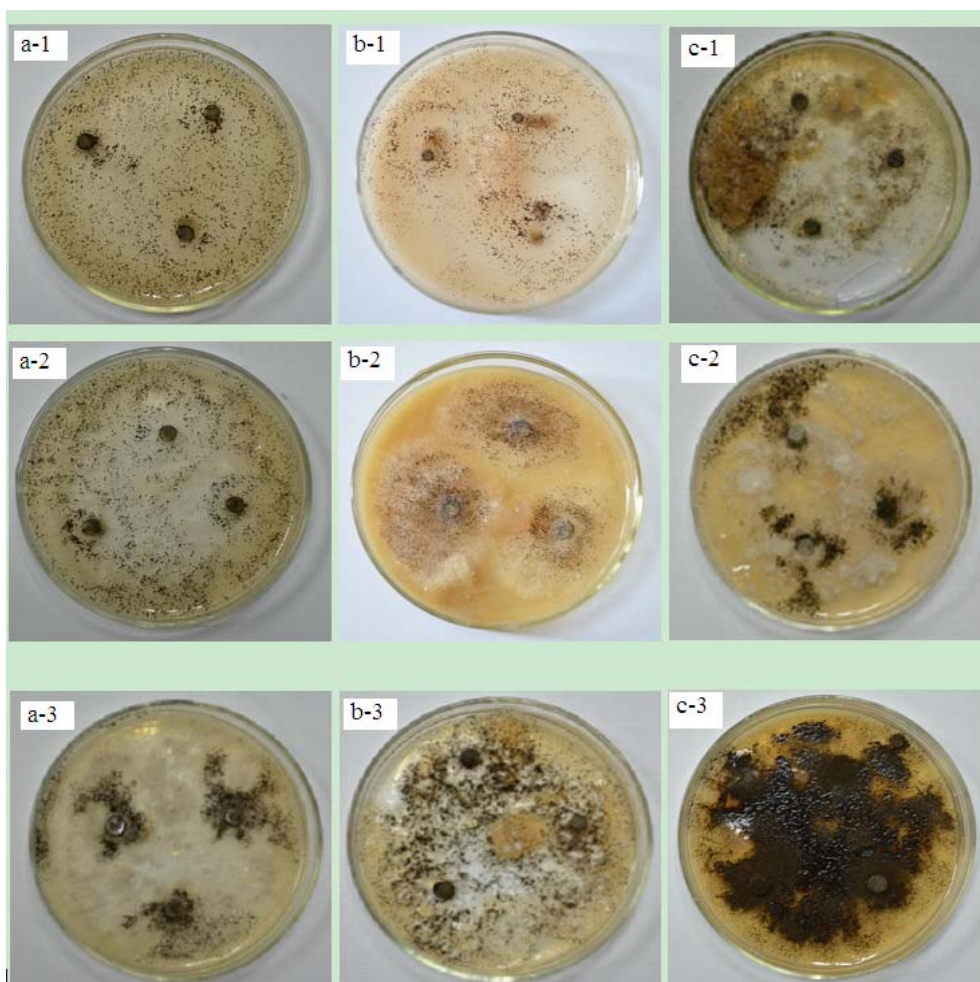

Fig. S6. Growth of *Aspergillus niger* on agar media containing  $\beta$ -CD (a),  $\beta$ -CDA (b) and MIP (c) as only carbon source.

From Fig. S6, it is obvious that the colony of bacteria is widely distributed on the medium containing MIP, which means that the MIP has a better biodegradability than  $\beta$ -CD or  $\beta$ -CDA.
